# Supplementary material for: Facile one-step synthesis of highly luminescent N-doped carbon dots as an efficient fluorescent probe for chromium(vi) detection based on the inner filter effect
Source: Royal Society of Chemistry journal article supplement (doi:10.1039/c8nj00216a), 2018-01-01
Supplement: c8nj00216a1.pdf [file c8nj00216a1.pdf]

## Supporting Information

### **Facile one-step synthesis of highly luminescent N-doped carbon dots as efficient fluorescence probe for chromium (VI) detection based on inner filter effect**

Haitao Wang,<sup>a,b,c</sup> Shan Liu,<sup>a,b,c</sup> Yisha Xie,<sup>a,b,c</sup> Jingran Bi,<sup>a,b,c</sup> Yao Li,<sup>a,b,c</sup> Yukun Song,<sup>a,b,c</sup> Shasha Cheng,<sup>a,b,c</sup> Dongmei Li,<sup>a,b,c</sup> Mingqian Tan<sup>a,b,c\*</sup>

*<sup>a</sup>School of Food Science and Technology, Dalian Polytechnic University, Dalian, Liaoning 116034, People's Republic of China*

*<sup>b</sup>National Engineering Research Center of Seafood, Dalian, Liaoning 116034, People's Republic of China*

*<sup>c</sup>Engineering Research Center of Seafood of Ministry of Education of China, Dalian, Liaoning 116034, People's Republic of China*

\* To whom correspondence should be addressed. E-mail: M. Tan, 2468750030@qq.com

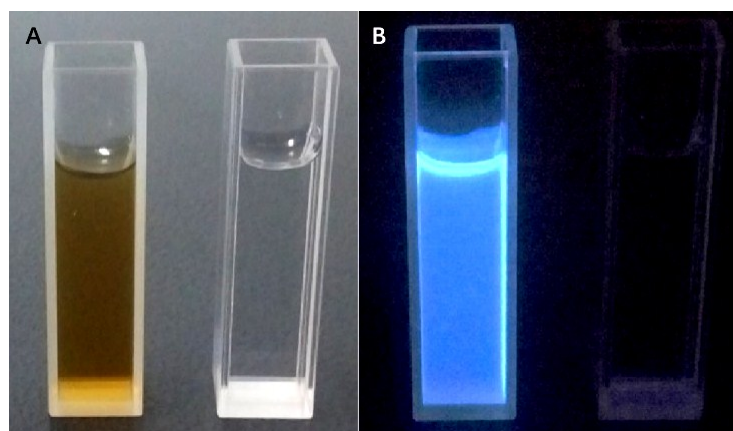

Figure S1 As-prepared reaction mixtures (left) and the starting materials (right) under irradiation with visible (A) and UV light (B).

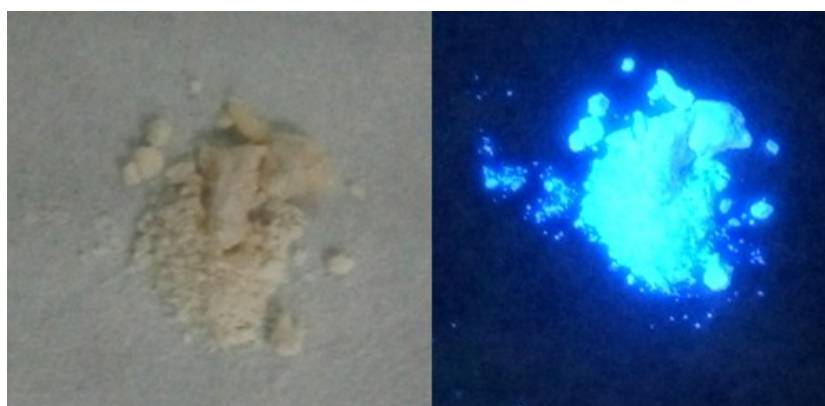

Figure S2. Photographs of the CG-CDs powder under irradiation with visible (left) and UV light (right).

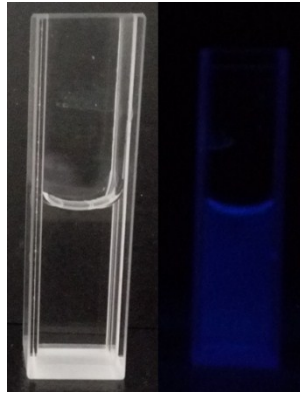

Figure S3. Photograph of the CG-CDs aqueous solution under irradiation with visible (left) and UV light (right)

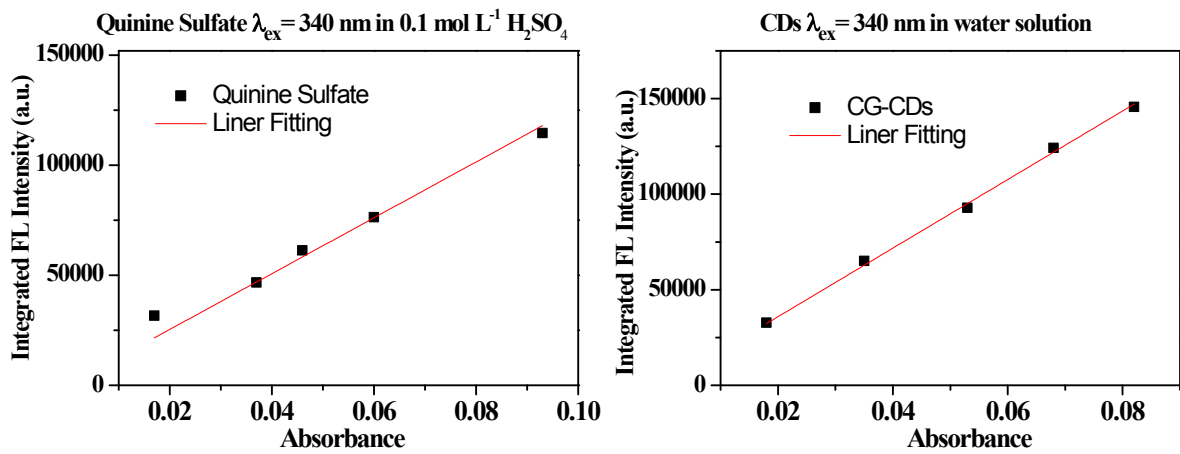

Figure S4. Plots of integrated fluorescence (FL) intensity of quinine sulfate (referenced dye) and CG-CDs synthesized from citric acid and glycine as a function of optical absorbance at 340 nm.

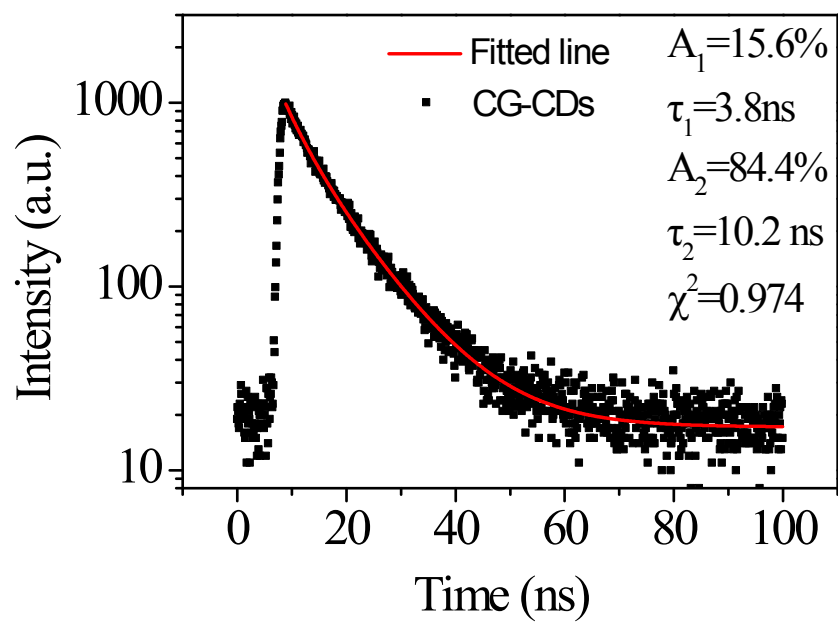

Figure S5 Fluorescence decay spectra and fitting curves of CG-CDs.

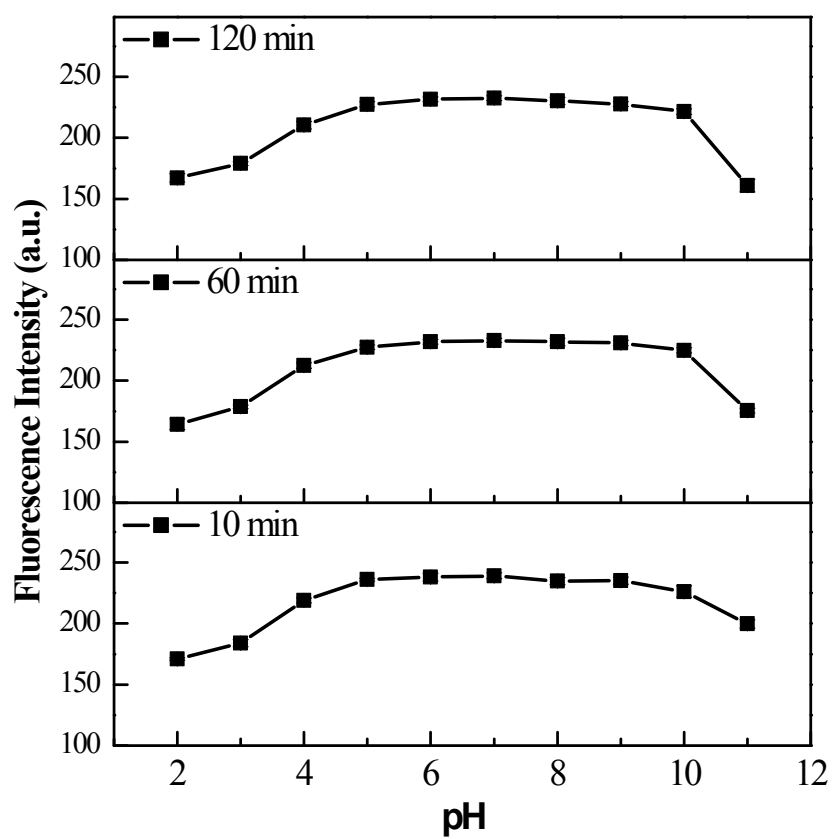

Figure S6. Effects of pH value on the fluorescence intensity of CG-CDs within 120 min.

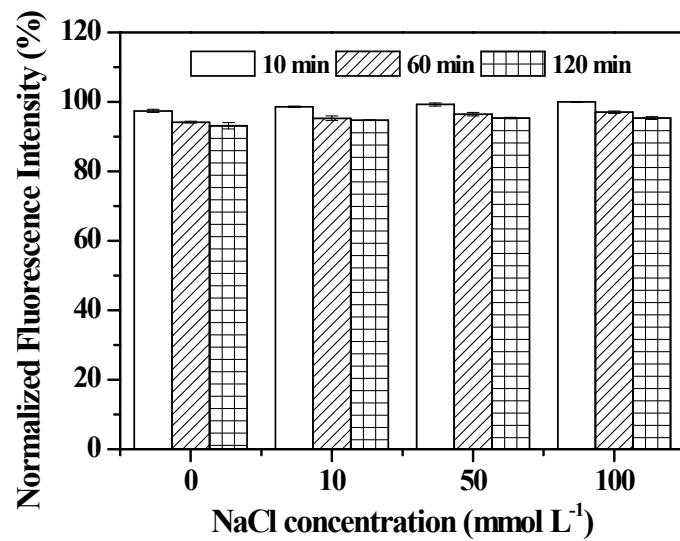

Figure S7. Effects of ionic strength of NaCl on the fluorescence intensity of CG-CDs within 120 min.

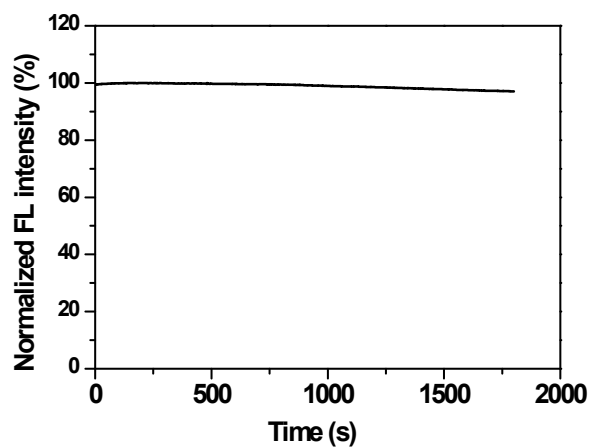

Figure S8. Photostability of fluorescence intensity for CG-CDs under continuous excitation at 340 nm for 30 min.

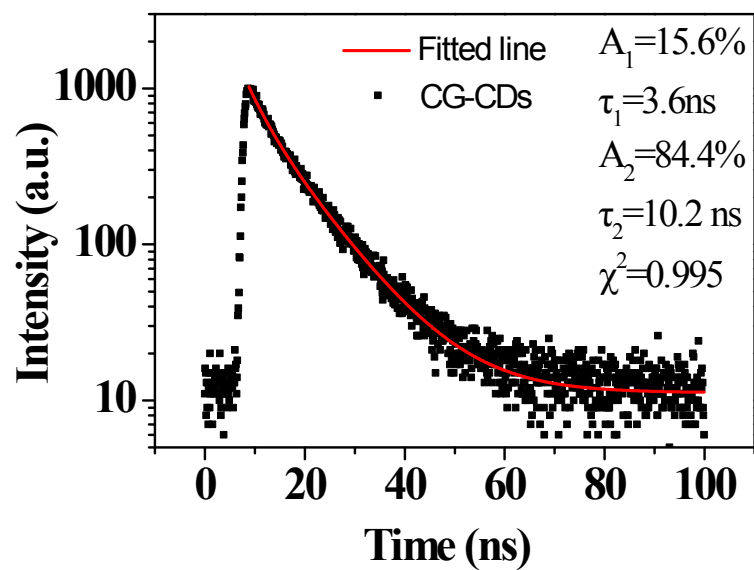

Figure S9. Fluorescence decay and fitting curves of CG-CDs in the presence of Cr (VI) (200  $\mu\text{M}$ ).

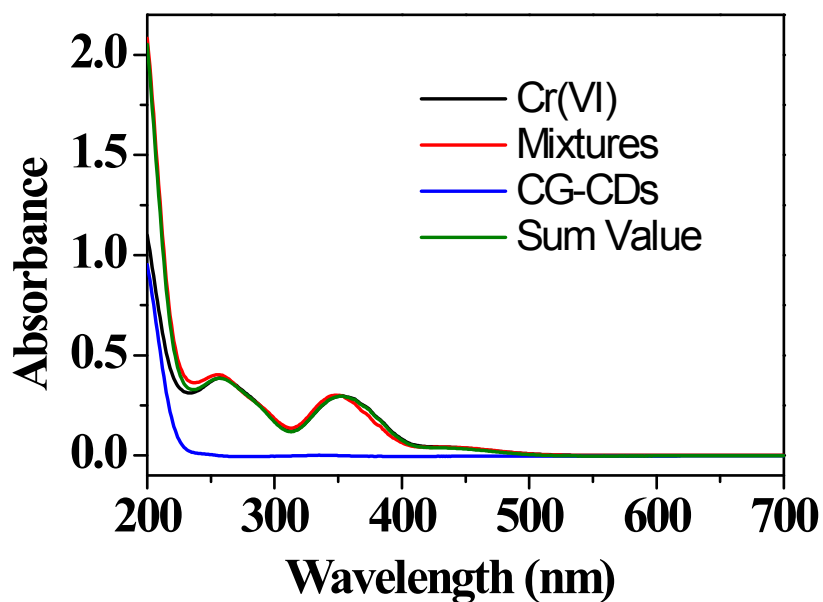

Figure S10. The UV-vis absorption spectra of CG-CDs, Cr(VI), CG-CDs- Cr(VI) mixtures and the sum value of absorbance of CG-CDs and Cr(VI).

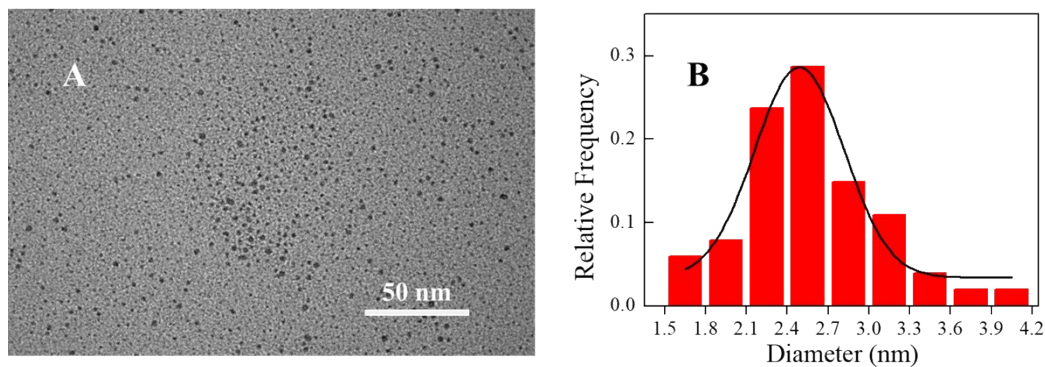

Figure S11. TEM image (A) and size distribution histogram (B) of CG-CDs in present of chromium (VI) ( $100 \mu\text{mol L}^{-1}$ ), the average size was 2.6 nm, which is similar to the pure CG-CDs.

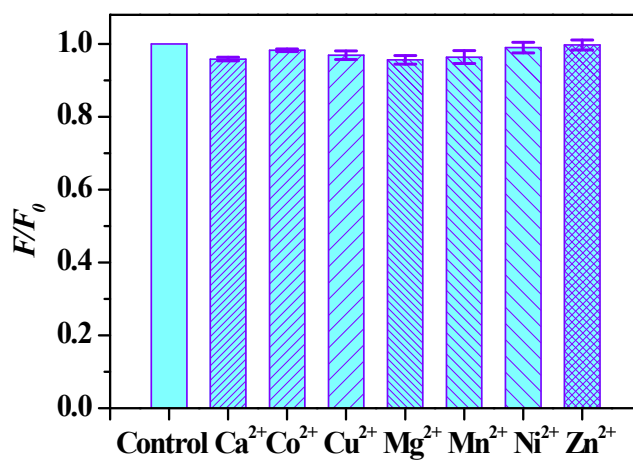

Figure S12. Fluorescence intensity response of CG-CDs in the presence of 200  $\mu\text{M}$  solution of various metal ions. The blank represents the fluorescence response of the solution of CG-CDs without adding any metal ion. The concentration of each kind of ion was 100  $\mu\text{M}$ .



Table S1. Parameters for QY calculation

|               | Quinine Sulfate      |       |       |       |        | CDs                  |       |       |        |        |
|---------------|----------------------|-------|-------|-------|--------|----------------------|-------|-------|--------|--------|
| Abs           | 0.017                | 0.037 | 0.046 | 0.06  | 0.093  | 0.018                | 0.035 | 0.053 | 0.068  | 0.082  |
| Integrated FL | 31662                | 46722 | 61250 | 76330 | 114662 | 32756                | 65095 | 92882 | 124230 | 145645 |
| lope          | 1.27×10 <sup>6</sup> |       |       |       |        | 1.79×10 <sup>6</sup> |       |       |        |        |
| QY            | 55%                  |       |       |       |        | 78%                  |       |       |        |        |

**FL:** fluorescence; **QY:** quantum yield.

Table S2. The comparison of the determination of Cr(VI)

| Methods                                                                         | Time consumption | Linear detection range                                 | Detection limit                               | Reference |
|---------------------------------------------------------------------------------|------------------|--------------------------------------------------------|-----------------------------------------------|-----------|
| Fluorescence method with carbon dot                                             | 1 min            | 0.01-50 $\mu\text{M}$                                  | /                                             | [1]       |
| Electrochemical detection based on gold nanoparticles                           | /                | 0.1-105 $\mu\text{M}$                                  | 0.03 $\mu\text{M}$                            | [2]       |
| Colorimetric method with gold nanoparticle                                      | 30 min           | 0.1-20 $\mu\text{M}$                                   | 0.088 $\mu\text{M}$                           | [3]       |
| Fluorescence method with AIQx modified SBA-15                                   | /                | 0.32-5.8 $\mu\text{M}$                                 | 7.7 nM                                        | [4]       |
| Colorimetric method with Ce(VI) and 1,5-DPC modified Paper microfluidic devices | 10 min           | 0.23-3.75 $\mu\text{g}$<br>(4.42-7.2 $\mu\text{mol}$ ) | 0.12 $\mu\text{g}$<br>(2.31 $\mu\text{mol}$ ) | [5]       |
| Colorimetric method with silver nanoparticle                                    | /                | 1 nM-1 mM                                              | 1 nM                                          | [6]       |
| Fluorescence method with graphitic carbon nitride nanosheets                    | 10 min           | 0.6-300 $\mu\text{M}$                                  | 0.15 $\mu\text{M}$                            | [7]       |
| boron and nitrogen co-doped carbon dots                                         | 1 min            | 1.39-260 $\mu\text{M}$                                 | 0.28 $\mu\text{M}$                            | [8]       |
| nitrogen and sulfur co-doped carbon dots                                        | 10 min           | 2-160 $\mu\text{M}$                                    | 1.72 $\mu\text{M}$                            | [9]       |

## References

1. Zheng, M.; Xie, Z.; Qu, D.; Li, D.; Du, P.; Jing, X.; Sun, Z., On-off-on fluorescent carbon dot nanosensor for recognition of chromium(vi) and ascorbic acid based on the inner filter effect. *ACS Appl. Mater. Interfaces* **2013**, *5*, 13242-13247.
2. Jin, W.; Wu, G.; Chen, A., Sensitive and selective electrochemical detection of chromium(VI) based on gold nanoparticle-decorated titania nanotube arrays. *Analyst* **2014**, *139*, 235-241.
3. Li, F.-M.; Liu, J.-M.; Wang, X.-X.; Lin, L.-P.; Cai, W.-L.; Lin, X.; Zeng, Y.-N.; Li, Z.-M.; Lin, S.-Q., Non-aggregation based label free colorimetric sensor for the detection of cr (VI) based on selective etching of gold nanorods. *Sensor. Actuat. B: Chem.* **2011**, *155*, 817-822.
4. Hosseini, M.; Gupta, V. K.; Ganjali, M. R.; Rafiei-Sarmazdeh, Z.; Faridbod, F.; Goldooz, H.; Badieli, A. R.; Norouzi, P., A novel dichromate-sensitive fluorescent nano-chemosensor using new functionalized SBA-15. *Ana. Chim. Acta* **2012**, *715*, 80-85.
5. Rattanarat, P.; Dungchai, W.; Cate, D. M.; Siangproh, W.; Volckens, J.; Chailapakul, O.; Henry, C. S., A microfluidic paper-based analytical device for rapid quantification of particulate chromium. *Ana.Chim. Acta* **2013**, *800*, 50-55.
6. Ravindran, A.; Elavarasi, M.; Prathna, T. C.; Raichur, A. M.; Chandrasekaran, N.; Mukherjee, A., Selective colorimetric detection of nanomolar Cr (VI) in aqueous solutions using unmodified silver nanoparticles. *Sensor. Actuat. B: Chem.* **2012**, *166-167*, 365-371.

7. Rong, M.; Lin, L.; Song, X.; Wang, Y.; Zhong, Y.; Yan, J.; Feng, Y.; Zeng, X.; Chen, X., Fluorescence sensing of chromium (VI) and ascorbic acid using graphitic carbon nitride nanosheets as a fluorescent “switch”. *Biosens. Bioelectron.* **2015**, *68*, 210-217.
8. Tian, T.; He, Y.; Ge, Y.; Song, G., One-pot synthesis of boron and nitrogen co-doped carbon dots as the fluorescence probe for dopamine based on the redox reaction between cr(vi) and dopamine. *Sensor. Actuat. B: Chem.* **2017**, *240*, 1265-1271.
9. Chen, J.; Liu, J.; Li, J.; Xu, L.; Qiao, Y., One-pot synthesis of nitrogen and sulfur co-doped carbon dots and its application for sensor and multicolor cellular imaging. *J. Colloid Interface Sci.* **2017**, *485*, 167-174.
